# Supplementary material
Source: publisher figshare collection journal article supplement (https://geolsoc.figshare.com/articles/dataset/_/3453956)
Supplement: Supplementary file 1 [file 1]

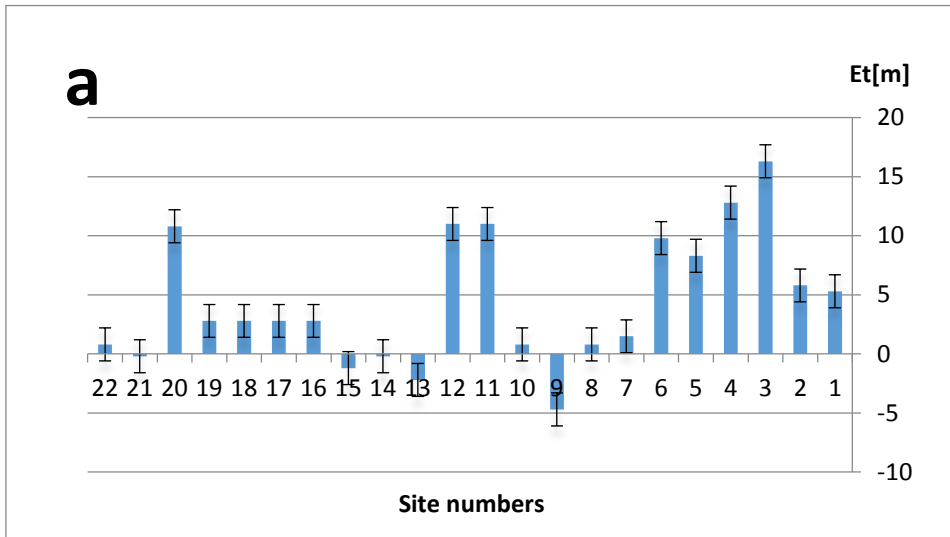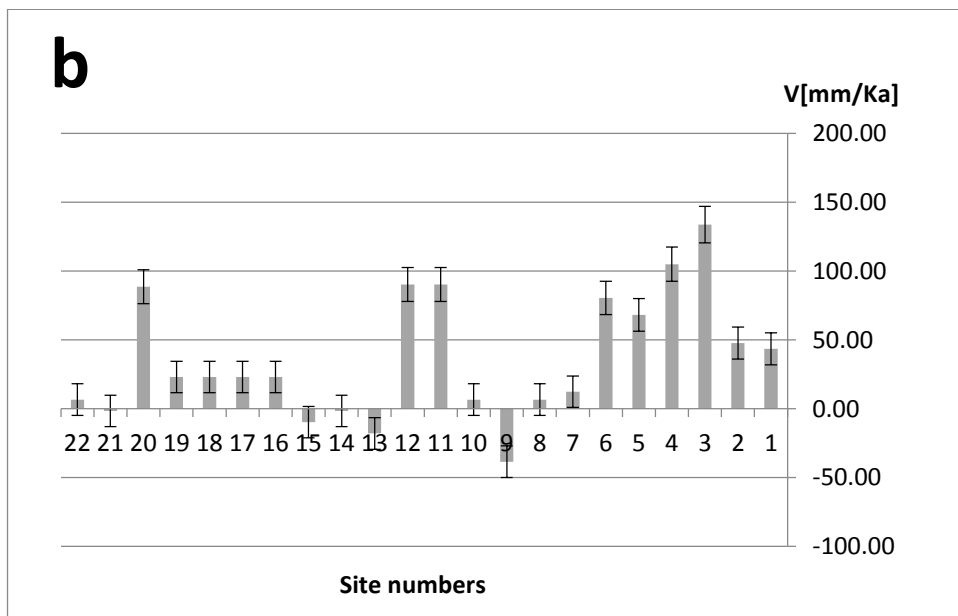

**Appendix 2:** a) Vertical changes values with errors, b) Rates of vertical changes (mm/Ka)  
Assuming MIS 5e = 122 Ka at elevation of 7.2 m above present SL
