# Supplementary material
Source: publisher figshare collection journal article supplement (https://geolsoc.figshare.com/articles/dataset/_/3453956)
Supplement: Supplementary file 2 [file 1]

| Site | e [m] | delta e [m] | vertical Change Et [m] | delta Et [m] | rate of change V [mm/Ka] |
|------|-------|-------------|------------------------|--------------|--------------------------|
| 1    | 12.5  | 0.5         | 6                      | 1.58         | 51.72                    |
| 2    | 13    | 0.5         | 6.5                    | 1.58         | 56.03                    |
| 3    | 23.5  | 0.5         | 17                     | 1.58         | 146.55                   |
| 4    | 20    | 0.5         | 13.5                   | 1.58         | 116.38                   |
| 5    | 15.5  | 0.5         | 9                      | 1.58         | 77.59                    |
| 6    | 17    | 0.5         | 10.5                   | 1.58         | 90.52                    |
| 7    | 8.7   | 0.5         | 2.2                    | 1.58         | 18.97                    |
| 8    | 8     | 0.5         | 1.5                    | 1.58         | 12.93                    |
| 9    | 2.5   | 0.5         | -4                     | 1.58         | -34.48                   |
| 10   | 8     | 0.5         | 1.5                    | 1.58         | 12.93                    |
| 11   | 18.2  | 0.5         | 11.7                   | 1.58         | 100.86                   |
| 12   | 18.2  | 0.5         | 11.7                   | 1.58         | 100.86                   |
| 13   | 5     | 0.5         | -1.5                   | 1.58         | -12.93                   |
| 14   | 7     | 0.5         | 0.5                    | 1.58         | 4.31                     |
| 15   | 6     | 0.5         | -0.5                   | 1.58         | -4.31                    |
| 16   | 10    | 0.5         | 3.5                    | 1.58         | 30.17                    |
| 17   | 10    | 0.5         | 3.5                    | 1.58         | 30.17                    |
| 18   | 10    | 0.5         | 3.5                    | 1.58         | 30.17                    |
| 19   | 10    | 0.5         | 3.5                    | 1.58         | 30.17                    |
| 20   | 18    | 0.5         | 11.5                   | 1.58         | 99.14                    |
| 21   | 7     | 0.5         | 0.5                    | 1.58         | 4.31                     |
| 22   | 8     | 0.5         | 1.5                    | 1.58         | 12.93                    |

**Appendix 3:** Site characteristics, vertical changes values (m) and rate of vertical changes assuming MIS 5e = 116Ka at elevation of 6.5 m above present SL (delta A=1000 years; E=6.5m; delta E=1.5 m)
