# Supplementary material
Source: publisher figshare collection journal article supplement (https://geolsoc.figshare.com/articles/dataset/_/3453956)
Supplement: Supplementary file 3 [file 1]

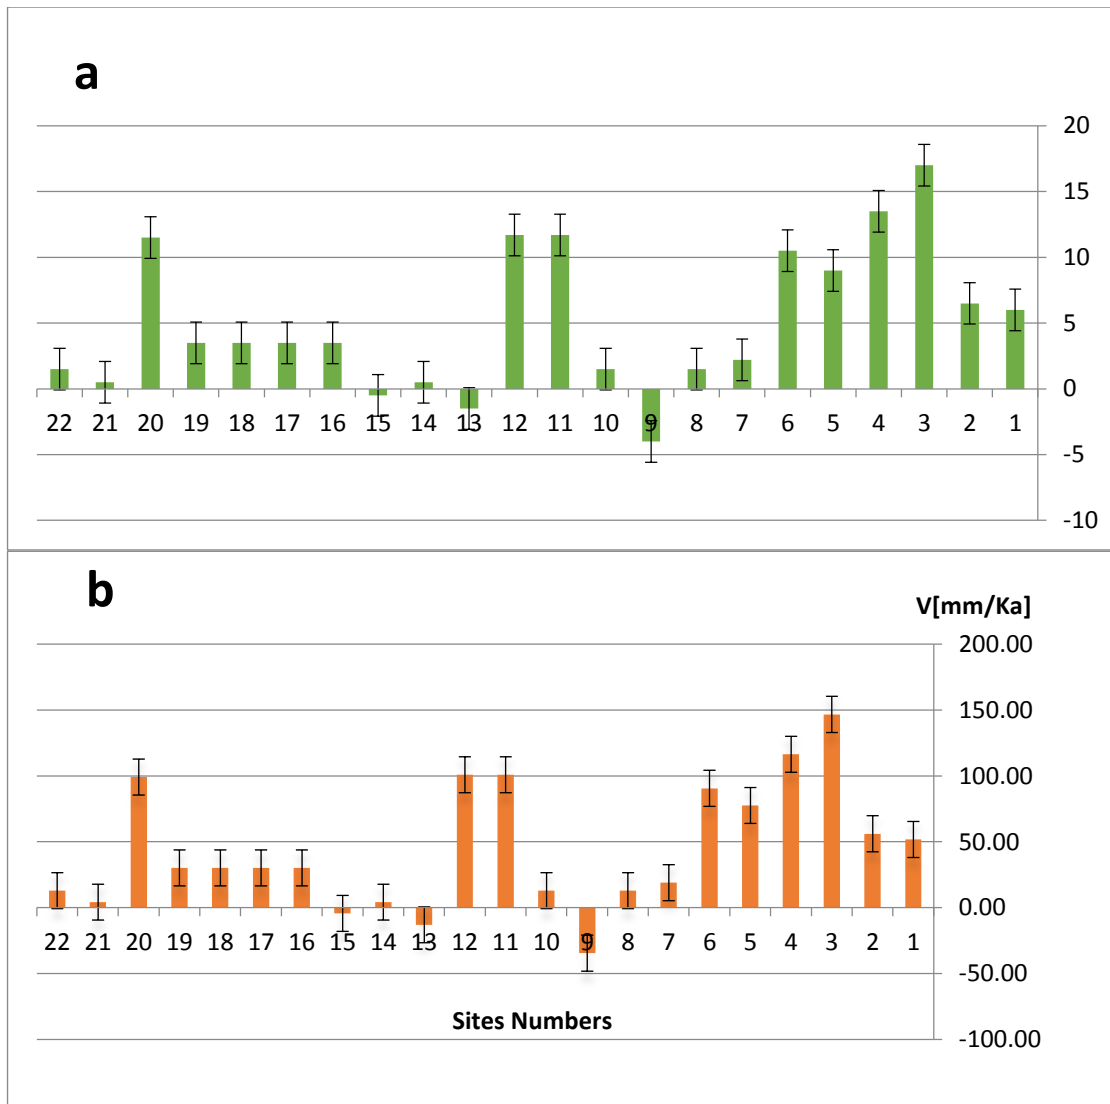

**Appendix 4:** a) Values of vertical changes (m) with errors, B) rates of vertical changes (mm/Ka) assuming MIS5e = 116 Ka at elevation of 6.5 m above present SL
